# Supplementary material for: Acinar transformed ductal cells exhibit differential mucin expression in a tamoxifen-induced pancreatic ductal adenocarcinoma mouse model
Source: PubMed Central journal article supplement (PMC7502593; doi:10.1242/bio.052878), 2020-09-07
Supplement: biolopen-9-052878-s1.pdf [file biolopen-9-052878-s1.pdf]

## Supplementary Figure 1

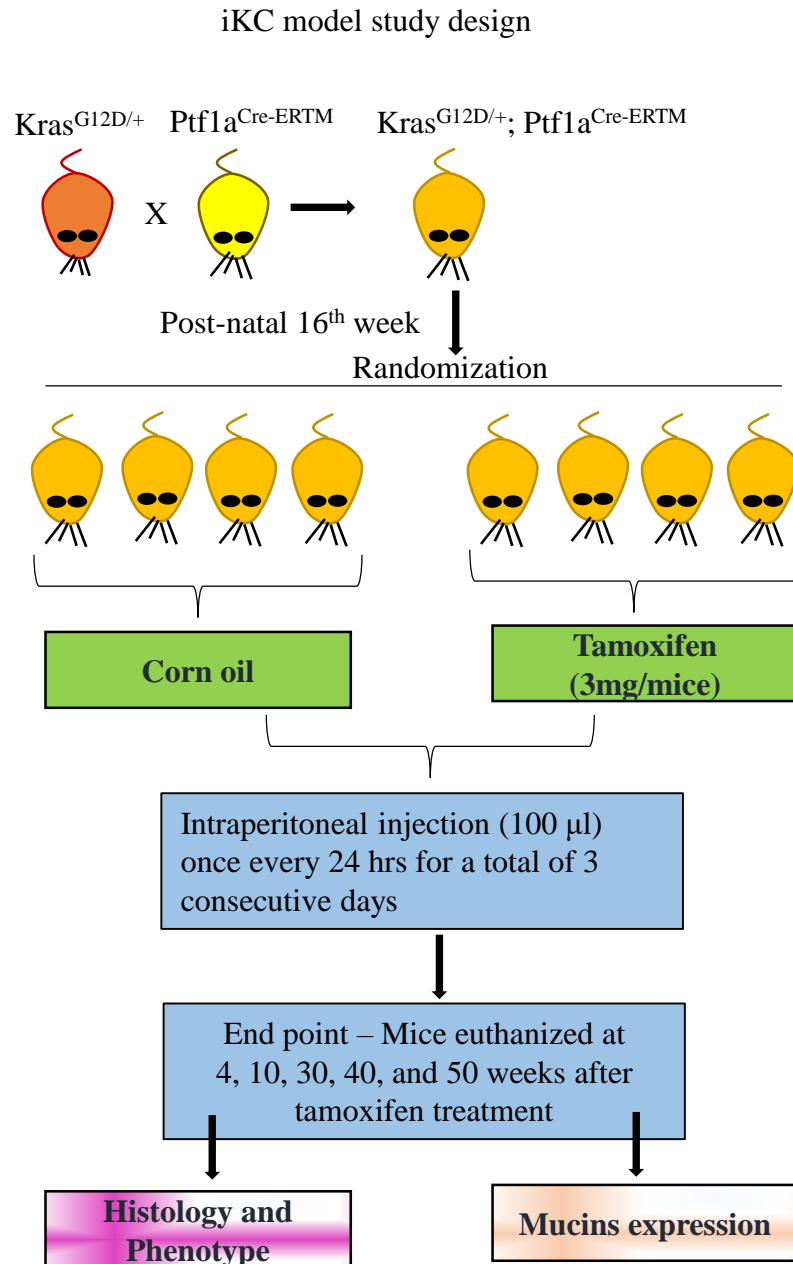

**Figure. S1. Flow chart design showing experimental strategies of the iKC mice model.** Overview of inducible KC (iKC) model breeding strategy, animal randomization, treatment procedures (route of administration, tamoxifen dosage, schedule), and endpoints were described as a schematic diagram.

Supplementary Figure 2

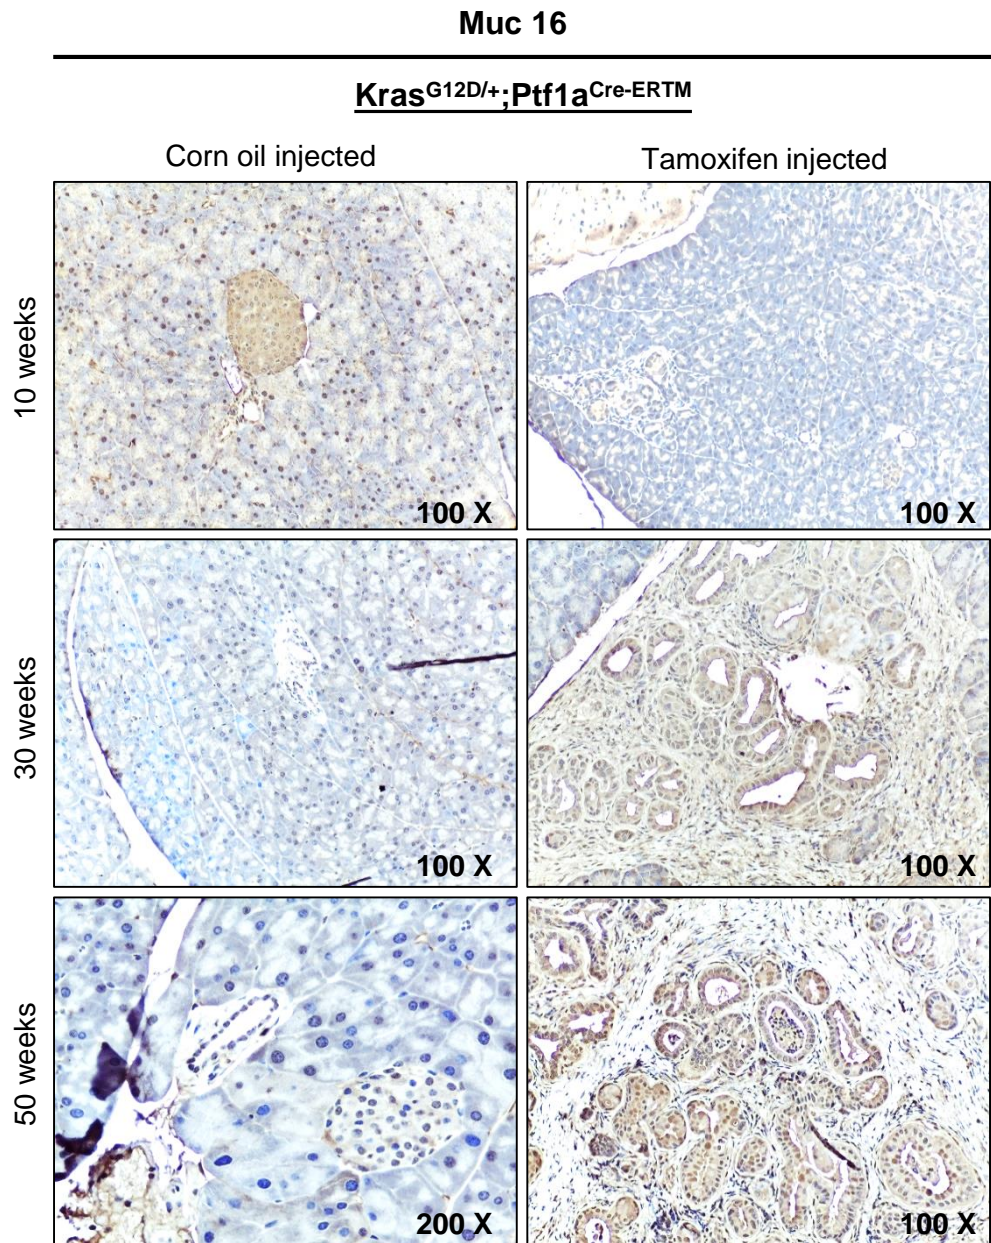

**Figure. S2. Expression profile of transmembrane mucin Muc16 in the tamoxifen-induced iKC mouse model.** IHC analysis for Muc16 expression was performed on pancreatic tissues isolated from corn oil- and tamoxifen-treated iKC mice. Expression of Muc16 was not detected in corn oil-treated mice (left column) but increased progressively from 10 to 50 weeks following tamoxifen injection (right column).

**Supplementary Figure 3**

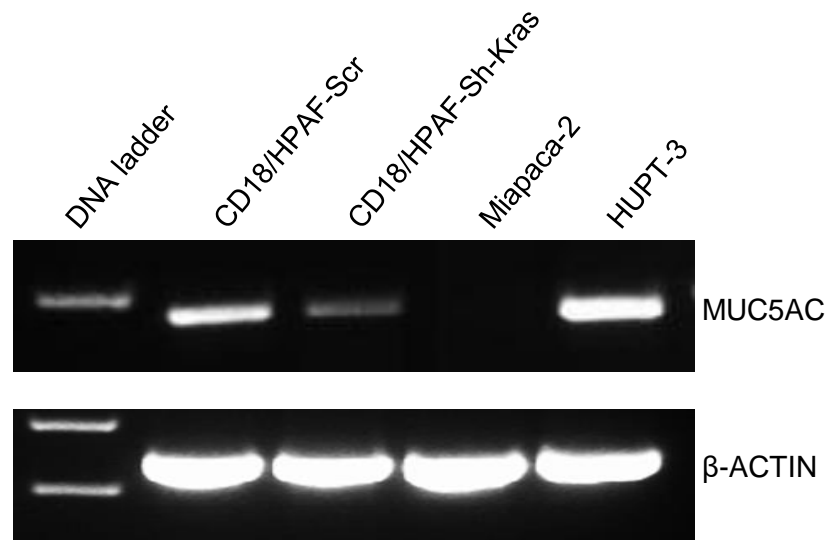

**Figure. S3. Depletion of  $Kras^{G12D}$  allele in pancreatic cancer cells.** Knock-down of  $Kras^{G12D}$  in CD-18/HPAF using the pRetro.Puro vector carrying an shRNA against mutated  $Kras$  led to a significant down-regulation of *MUC5AC*. Beta-actin served as an internal loading control.

Supplementary Figure 4

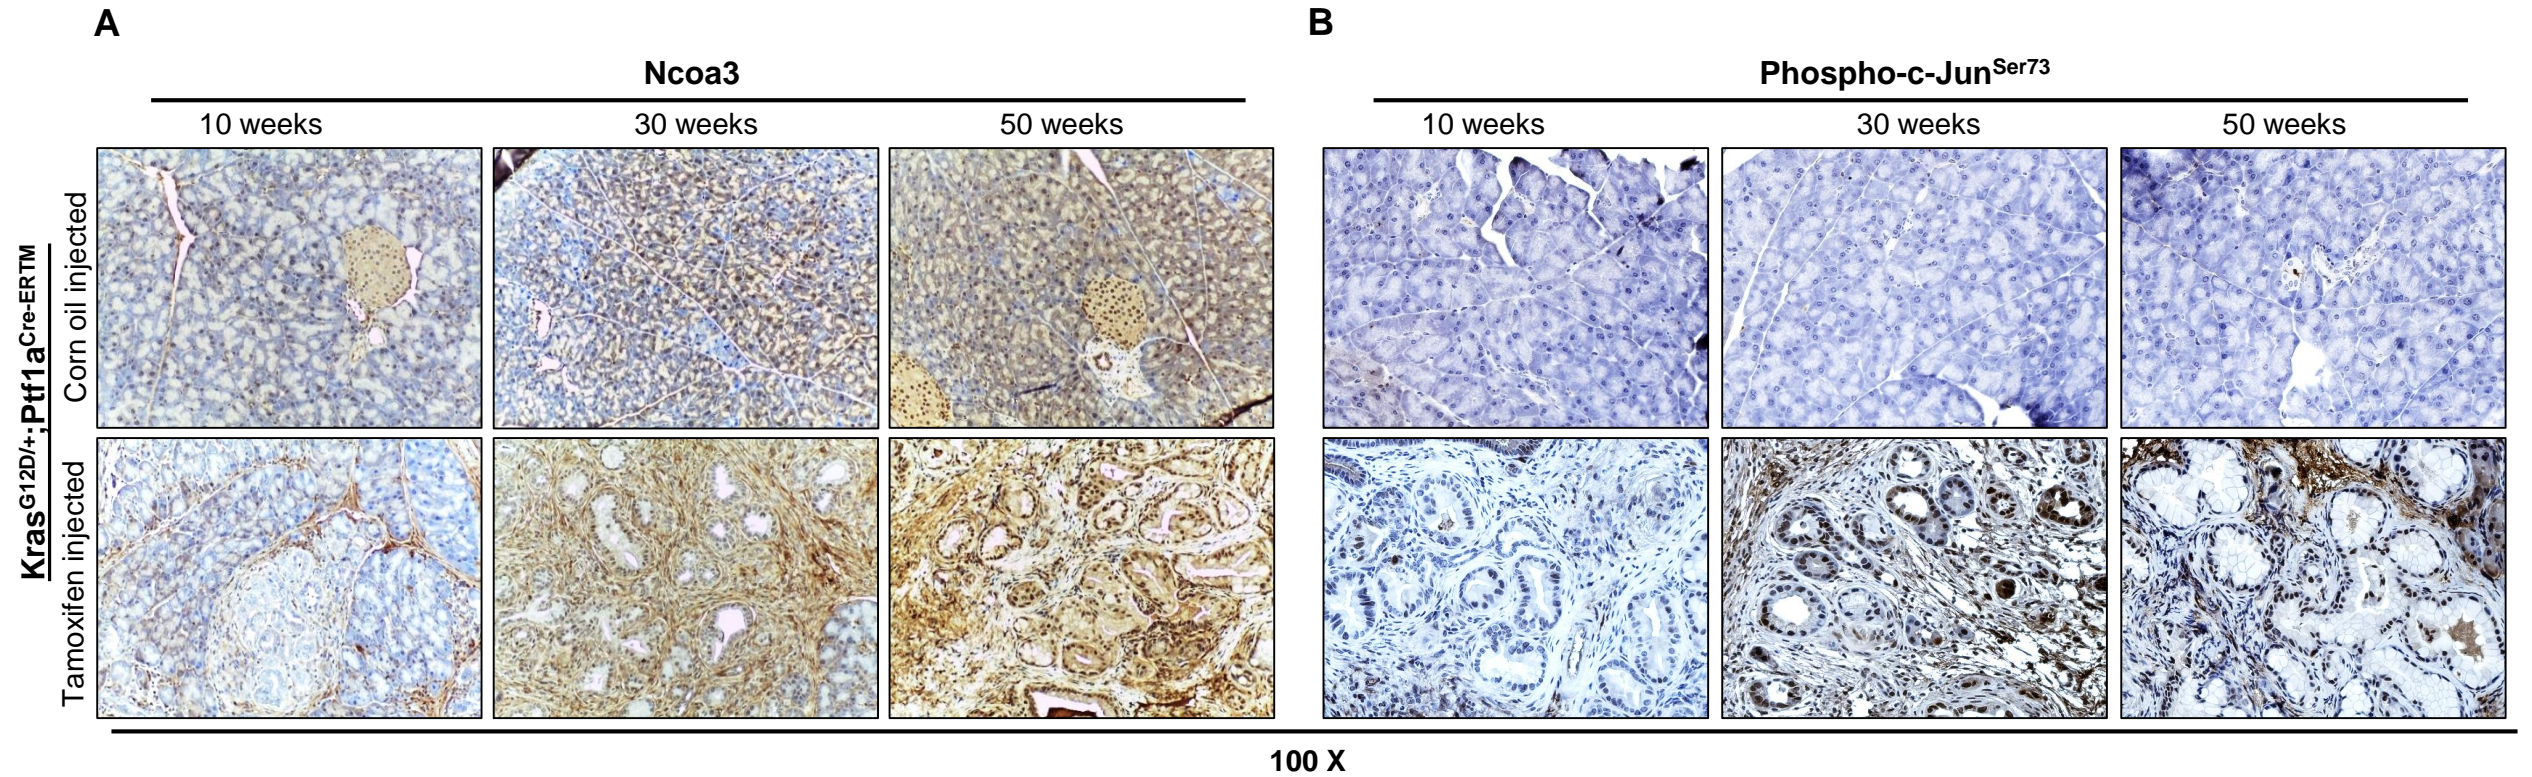

**Figure. S4. Expression profile of Ncoa3 and p-cJun in the tamoxifen-induced iKC mouse model.** IHC studies using Ncoa3 and p-cJun antibodies were performed on pancreatic tissues isolated from corn oil- and tamoxifen-treated iKC mice. (A) Expression of Ncoa3 and (B) p-cJun in the nucleus of iKC pancreas cells was low (basal level) but increased upon tamoxifen injection.
